# Supplementary material for: Rare intermolecular M⋯H–C anagostic interactions in homoleptic Ni(ii)–Pd(ii) dithiocarbamate complexes
Source: Royal Society of Chemistry journal article supplement (doi:10.1039/c5nj00452g), 2015-01-01
Supplement: c5nj00452g1.pdf [file c5nj00452g1.pdf]

## Electronic Supporting Information

### Rare intermolecular M···H-C anagostic interactions in homoleptic Ni(II)/Pd(II) dithiocarbamate complexes

Manoj Kumar Yadav <sup>a</sup>, Gunjan Rajput <sup>a</sup>, Lal Bahadur Prasad <sup>a</sup>, Michael G. B. Drew <sup>b</sup> and Nanhai Singh <sup>a\*</sup>

<sup>a</sup>Department of Chemistry, Faculty of Science, Banaras Hindu University,

Varanasi 221005, India. Fax: +91-542-2386127

E-mail: [nsingh@bhu.ac.in](mailto:nsingh@bhu.ac.in), [nsinghbhu@gmail.com](mailto:nsinghbhu@gmail.com)

<sup>b</sup> Department of Chemistry, University of Reading, Whiteknights, Reading, RG6 6AD (U.K.)

### Contents

**S1. UV-Vis. spectra**

**S2. Pressed pellet conductivity**

## S1. UV-Vis. spectra

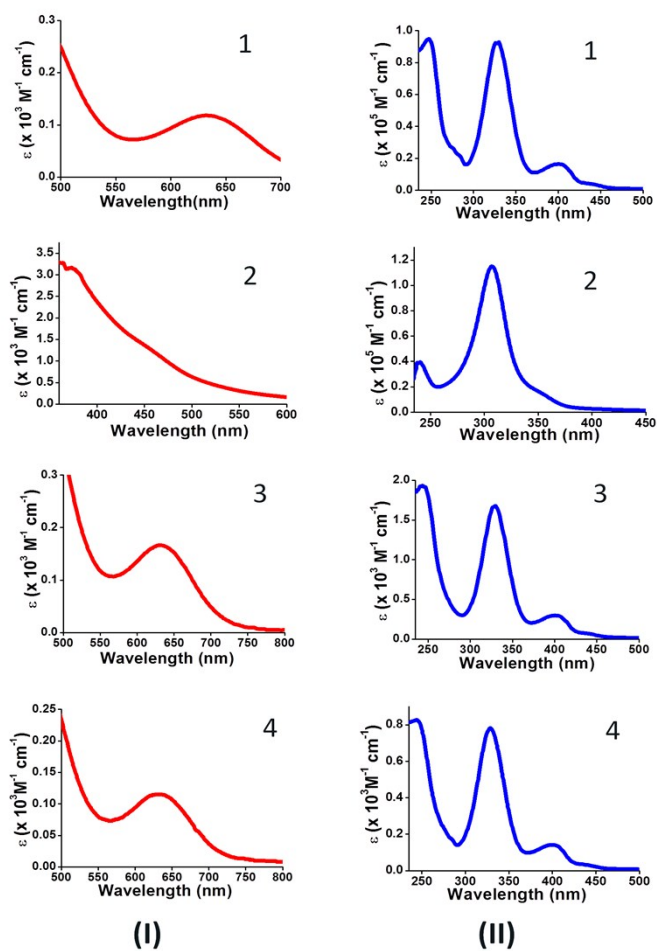

Fig. S1 Electronic absorption spectra for **1-4**, (I) at  $10^{-3}$  M concentration in  $\text{CH}_2\text{Cl}_2$  solution and (II) at  $10^{-5}$  M concentration revealing ILCT, MLCT and d-d transitions.

## S2. Pressed pellet conductivity

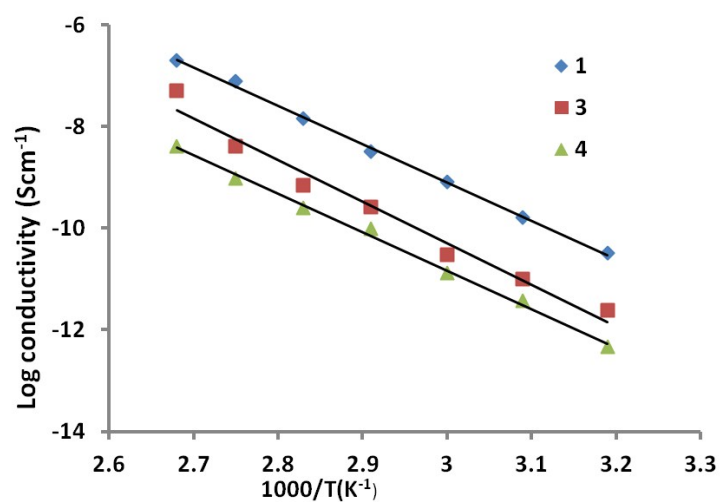

Fig. S2 Temperature dependent pressed pellet electrical conductivity of **1**, **3** and **4** was measured with a Keithly 236 source measure unit by employing the conventional two-probe technique.
